# Supplementary material for: Systematic Comparison of Plant Promoters in Nicotiana spp. Expression Systems
Source: MDPI journal article supplement (doi:10.3390/ijms232315441), 2022-12-06
Supplement: s1 [file s1]

# Systematic comparison of plant promoters in *Nicotiana* spp. expression systems

Ekaterina S. Shakhova, Nadezhda M. Markina, Tatiana Mitouchkina, Evgenia N. Bugaeva, Tatiana A. Karataeva, Kseniia A. Palkina, Liliia I. Fakhranurova, Ilia V. Yampolsky, Karen S. Sarkisyan, Alexander S. Mishin\*

Supplementary information

|                                                                                      |          |
|--------------------------------------------------------------------------------------|----------|
| <b>Table S1. Level 1 vectors used in this study.</b>                                 | <b>2</b> |
| <b>Table S2. Level 0 plasmids with promoters and terminators used in this study.</b> | <b>4</b> |
| <b>Table S3. Primers used in this study.</b>                                         | <b>8</b> |

**Table S1.** Level 1 vectors used in this study.

| Type               | ID      | Structure                                               | Sequence                                                                                                                                                                |
|--------------------|---------|---------------------------------------------------------|-------------------------------------------------------------------------------------------------------------------------------------------------------------------------|
| Virus promoter     | pNK955  | Level1   p35s_0.4kb - 5'UTR TMV omega - EGFP - tOCS     | <a href="https://benchling.com/s/seq-Xv4yj8acyzr5Ms9vWE92?m=slm-Z04z3oSgMyZVnFCU5oP3">https://benchling.com/s/seq-Xv4yj8acyzr5Ms9vWE92?m=slm-Z04z3oSgMyZVnFCU5oP3</a>   |
|                    | pNK1481 | Level1   p35s_0.4kb - 5'UTR AtRBCS2B - EGFP - tOCS      | <a href="https://benchling.com/s/seq-NWaRFM9UiqVg3Kk62CD3?m=slm-yd34JT03rKFJl2FQ2FrR">https://benchling.com/s/seq-NWaRFM9UiqVg3Kk62CD3?m=slm-yd34JT03rKFJl2FQ2FrR</a>   |
|                    | pX088   | Level1   pFMV - EGFP - tOCS                             | <a href="https://benchling.com/s/seq-IBV1TXfJMIvmcuLdRbTg?m=slm-PJ0oohwynpUw1tVppfWr">https://benchling.com/s/seq-IBV1TXfJMIvmcuLdRbTg?m=slm-PJ0oohwynpUw1tVppfWr</a>   |
|                    | pX089   | Level1   pCmYLCV - EGFP - tOCS                          | <a href="https://benchling.com/s/seq-BzVQwacCASJ3QiXyT5LS?m=slm-mGNqUdrifxQz9BzGYI1n">https://benchling.com/s/seq-BzVQwacCASJ3QiXyT5LS?m=slm-mGNqUdrifxQz9BzGYI1n</a>   |
| Synthetic promoter | pNK951  | Level1   pMinSyn104 - 5'UTR AtRBCS2B - EGFP - tOCS      | <a href="https://benchling.com/s/seq-0kYMTsYtcpEFoA5rVmsy?m=slm-3b27GbcFKiY6r614Pwxz">https://benchling.com/s/seq-0kYMTsYtcpEFoA5rVmsy?m=slm-3b27GbcFKiY6r614Pwxz</a>   |
|                    | pNK1513 | Level1   pMinSyn105 - 5'UTR AtRBCS2B - EGFP - tOCS      | <a href="https://benchling.com/s/seq-jgWZjw7OI5PjWVqSbXAh?m=slm-dR4dUflhyHbZQS2LoZ4f">https://benchling.com/s/seq-jgWZjw7OI5PjWVqSbXAh?m=slm-dR4dUflhyHbZQS2LoZ4f</a>   |
|                    | pNK1141 | Level1   pMinSyn108 - 5'UTR AtRBCS2B - EGFP - tOCS      | <a href="https://benchling.com/s/seq-OS9XK2vW90gpwnk5SYAb?m=slm-viewEeMhX16F6R1HambEF">https://benchling.com/s/seq-OS9XK2vW90gpwnk5SYAb?m=slm-viewEeMhX16F6R1HambEF</a> |
|                    | pNK1137 | Level1   pMinSyn110 - 5'UTR AtRBCS2B - EGFP - tOCS      | <a href="https://benchling.com/s/seq-VpQlZc8dgtwbPd3iUmvX?m=slm-OLWrMFaWIEgMlHGlbtLx">https://benchling.com/s/seq-VpQlZc8dgtwbPd3iUmvX?m=slm-OLWrMFaWIEgMlHGlbtLx</a>   |
|                    | pNK952  | Level1   pMinSyn159x - 5'UTR AtRBCS2B - EGFP - tOCS     | <a href="https://benchling.com/s/seq-s5B6tzYHfvqwuXx2UoVu?m=slm-qic0dr0QGeRLKIVGsKAi">https://benchling.com/s/seq-s5B6tzYHfvqwuXx2UoVu?m=slm-qic0dr0QGeRLKIVGsKAi</a>   |
|                    | pNK1112 | Level1   pMinSyn159x - 5'UTR AtRBCS2B - EGFP - tAct2    | <a href="https://benchling.com/s/seq-oYCEmyaF71RfBpTabEFg?m=slm-riK7MJUwcGiEKw96thBA">https://benchling.com/s/seq-oYCEmyaF71RfBpTabEFg?m=slm-riK7MJUwcGiEKw96thBA</a>   |
|                    | pNK1412 | Level1   pMinSyn159x - 5'UTR AtRBCS2B - EGFP - tRBCS3C  | <a href="https://benchling.com/s/seq-ztYZj76YosOM2A2iNW1U?m=slm-DtHx6UiaPicCpug1FOyH">https://benchling.com/s/seq-ztYZj76YosOM2A2iNW1U?m=slm-DtHx6UiaPicCpug1FOyH</a>   |
|                    | pNK1236 | Level1   pMinSyn159x - 5'UTR AtRBCS2B - EGFP - tATPase  | <a href="https://benchling.com/s/seq-aPufVoUSKizTaFhT2E3E?m=slm-NrKKtuxswElZN1Ax1N82">https://benchling.com/s/seq-aPufVoUSKizTaFhT2E3E?m=slm-NrKKtuxswElZN1Ax1N82</a>   |
|                    | pNK1111 | Level1   pMinSyn159x - 5'UTR AtRBCS2B - EGFP - tHSP18.2 | <a href="https://benchling.com/s/seq-wjSuFYeCnattBzyfJgW4?m=slm-RI5kiSudgkfkJeObr49">https://benchling.com/s/seq-wjSuFYeCnattBzyfJgW4?m=slm-RI5kiSudgkfkJeObr49</a>     |
|                    | pNK1140 | Level1   pMinSyn1556x - 5'UTR AtRBCS2B - EGFP - tOCS    | <a href="https://benchling.com/s/seq-hLOY4zQtQts9lCyJgKBs?m=slm-CGqSZUiNYxwabad00fWO">https://benchling.com/s/seq-hLOY4zQtQts9lCyJgKBs?m=slm-CGqSZUiNYxwabad00fWO</a>   |
|                    | pNK1138 | Level1-1   pMinSyn1569x - 5'UTR AtRBCS2B - EGFP - tOCS  | <a href="https://benchling.com/s/seq-19omt2Y0LD6NW9aeAK1G?m=slm-uflaYDAe812s51fEk8YE">https://benchling.com/s/seq-19omt2Y0LD6NW9aeAK1G?m=slm-uflaYDAe812s51fEk8YE</a>   |
|                    | pNK1515 | Level1   pMinSyn1637x - 5'UTR AtRBCS2B - EGFP - tOCS    | <a href="https://benchling.com/s/seq-SyrFSUGSJwj2uGYBEQ7A?m=slm-0kpvhriPePECa20BKkm5">https://benchling.com/s/seq-SyrFSUGSJwj2uGYBEQ7A?m=slm-0kpvhriPePECa20BKkm5</a>   |
|                    | pNK1036 | Level1   pMinSyn1824x - 5'UTR AtRBCS2B - EGFP - tOCS    | <a href="https://benchling.com/s/seq-gyWD4RBezBWQxFdQl6rm?m=slm-t9BfguUZgXrirE5XYSQs">https://benchling.com/s/seq-gyWD4RBezBWQxFdQl6rm?m=slm-t9BfguUZgXrirE5XYSQs</a>   |
|                    | pNK1037 | Level1   pMinSyn1904x - 5'UTR AtRBCS2B - EGFP - tOCS    | <a href="https://benchling.com/s/seq-TU9mjtZ0iPxozRGdvp0G?m=slm-tPn3qpoBsNjcnzy6rUG">https://benchling.com/s/seq-TU9mjtZ0iPxozRGdvp0G?m=slm-tPn3qpoBsNjcnzy6rUG</a>     |

|                |         |                                                         |                                                                                                                                                                         |
|----------------|---------|---------------------------------------------------------|-------------------------------------------------------------------------------------------------------------------------------------------------------------------------|
| Plant promoter | pNK953  | Level1   <b>pAtTCTP</b> - EGFP - tOCS                   | <a href="https://benchling.com/s/seq-8fQel0byzUI350uKtDYr?m=slm-EVEL4TI37GQodCF8wJq6">https://benchling.com/s/seq-8fQel0byzUI350uKtDYr?m=slm-EVEL4TI37GQodCF8wJq6</a>   |
|                | pNK1145 | Level1   <b>pAtTCTP</b> - EGFP - <b>tAct2</b>           | <a href="https://benchling.com/s/seq-rV4DWhZy2F8GIzrsT9NS?m=slm-BfB3mJNUvII4Od4GDlb">https://benchling.com/s/seq-rV4DWhZy2F8GIzrsT9NS?m=slm-BfB3mJNUvII4Od4GDlb</a>     |
|                | pNK1152 | Level1   <b>pAtTCTP</b> - EGFP - <b>tRBCS3C</b>         | <a href="https://benchling.com/s/seq-8pJOK3HtycSzLCRpLpAz?m=slm-EjZVbezI09ucYHnsBqNz">https://benchling.com/s/seq-8pJOK3HtycSzLCRpLpAz?m=slm-EjZVbezI09ucYHnsBqNz</a>   |
|                | pNK1143 | Level1-1   <b>pAtTCTP</b> - EGFP - <b>tATPase</b>       | <a href="https://benchling.com/s/seq-YYeDtylG69ZQrAqnUlyD?m=slm-waMZwW0kseP60KbNrp80">https://benchling.com/s/seq-YYeDtylG69ZQrAqnUlyD?m=slm-waMZwW0kseP60KbNrp80</a>   |
|                | pNK1114 | Level1   <b>pAtTCTP</b> - EGFP - <b>tHSP18.2</b>        | <a href="https://benchling.com/s/seq-9kcntvkxWSNYzQyvoUuM?m=slm-Hrv8rcIAXuKELmISuTbE">https://benchling.com/s/seq-9kcntvkxWSNYzQyvoUuM?m=slm-Hrv8rcIAXuKELmISuTbE</a>   |
|                | pNK954  | Level1   <b>pdeI5_MtHP</b> - EGFP - tOCS                | <a href="https://benchling.com/s/seq-QvJzk8QaFH1e108jAYbl?m=slm-fXzAyVAzwBKLxr87DQNf">https://benchling.com/s/seq-QvJzk8QaFH1e108jAYbl?m=slm-fXzAyVAzwBKLxr87DQNf</a>   |
|                | pNK1110 | Level1   <b>pdeI5_MtHP</b> - EGFP - <b>tAct2</b>        | <a href="https://benchling.com/s/seq-ivePFin9Q5nAZf4C0VnD?m=slm-l44K4zjb90hxGAS1PMTv">https://benchling.com/s/seq-ivePFin9Q5nAZf4C0VnD?m=slm-l44K4zjb90hxGAS1PMTv</a>   |
|                | pNK1109 | Level1   <b>pdeI5_MtHP</b> - EGFP - <b>tRBCS3C</b>      | <a href="https://benchling.com/s/seq-Y0p5GIBsbAcEV4hn84MI?m=slm-EEdXCcENRhGd7bJjCeQT">https://benchling.com/s/seq-Y0p5GIBsbAcEV4hn84MI?m=slm-EEdXCcENRhGd7bJjCeQT</a>   |
|                | pNK1113 | Level1   <b>pdeI5_MtHP</b> - EGFP - <b>tATPase</b>      | <a href="https://benchling.com/s/seq-l1VojRlInf0GEhwhl1f3m?m=slm-gVPTKyqzFagJyE41nb5z">https://benchling.com/s/seq-l1VojRlInf0GEhwhl1f3m?m=slm-gVPTKyqzFagJyE41nb5z</a> |
|                | pNK1144 | Level1   <b>pdeI5_MtHP</b> - EGFP - <b>tHSP18.2</b>     | <a href="https://benchling.com/s/seq-StzkvqM01NeKpD4eTwmn?m=slm-yFiElb0eKdoydeRkdEDL">https://benchling.com/s/seq-StzkvqM01NeKpD4eTwmn?m=slm-yFiElb0eKdoydeRkdEDL</a>   |
|                | pNK931  | Level1   <b>pAtUBQ10</b> - EGFP - tOCS                  | <a href="https://benchling.com/s/seq-TzWi1PDZB5OVr2ws61GE?m=slm-mqXjDgtkE7aeSCsH399o">https://benchling.com/s/seq-TzWi1PDZB5OVr2ws61GE?m=slm-mqXjDgtkE7aeSCsH399o</a>   |
|                | pNK1106 | Level1   <b>pAtUBQ10</b> - EGFP - <b>tAct2</b>          | <a href="https://benchling.com/s/seq-ApnWp2eG3BQdHu664IMh?m=slm-weypOv2dQBHSmaZvEk8l">https://benchling.com/s/seq-ApnWp2eG3BQdHu664IMh?m=slm-weypOv2dQBHSmaZvEk8l</a>   |
|                | pNK1108 | Level1   <b>pAtUBQ10</b> - EGFP - <b>tRBCS3C</b>        | <a href="https://benchling.com/s/seq-hVLNKYvVIK1qf11tVblC?m=slm-DDzyAFgWHYyiC2Fmyh5z">https://benchling.com/s/seq-hVLNKYvVIK1qf11tVblC?m=slm-DDzyAFgWHYyiC2Fmyh5z</a>   |
|                | pNK1107 | Level1   <b>pAtUBQ10</b> - EGFP - <b>tATPase</b>        | <a href="https://benchling.com/s/seq-cvAPHcypUt5fYh2j2Wdu?m=slm-MTzgxDRKhI2tGC1YmooF">https://benchling.com/s/seq-cvAPHcypUt5fYh2j2Wdu?m=slm-MTzgxDRKhI2tGC1YmooF</a>   |
|                | pNK1142 | Level1   <b>pAtUBQ10</b> - EGFP - <b>tHSP18.2</b>       | <a href="https://benchling.com/s/seq-twwPDlyKDsdzux0R0Dvc?m=slm-UykClrMtTr0IIBWOL904">https://benchling.com/s/seq-twwPDlyKDsdzux0R0Dvc?m=slm-UykClrMtTr0IIBWOL904</a>   |
|                | pNK930  | Level1   <b>pAtRPS5a</b> - EGFP - tOCS                  | <a href="https://benchling.com/s/seq-ykQtGbOXM8pmSlZjgnNa?m=slm-C7lg4SOTyizdhjTqbfYu">https://benchling.com/s/seq-ykQtGbOXM8pmSlZjgnNa?m=slm-C7lg4SOTyizdhjTqbfYu</a>   |
|                | pNK932  | Level1   <b>pAtPD7</b> - EGFP - tOCS                    | <a href="https://benchling.com/s/seq-PXTVGBjl2QJHHahIFIDR?m=slm-wAJ0Fs00laLRH0eL5hUj">https://benchling.com/s/seq-PXTVGBjl2QJHHahIFIDR?m=slm-wAJ0Fs00laLRH0eL5hUj</a>   |
|                | pX083   | Level1   <b>pAtAct2</b> - 5'UTR TMV omega - EGFP - tOCS | <a href="https://benchling.com/s/seq-0ZfjzZWajg0osBlilCcA?m=slm-5BILr6n3iYcUyQEzrefo">https://benchling.com/s/seq-0ZfjzZWajg0osBlilCcA?m=slm-5BILr6n3iYcUyQEzrefo</a>   |

**Table S2.** Level 0 plasmids with promoters and terminators used in this study.

| ID                                                              | Name of the construct                                    | Sequence                                                                                                                                                              | DNA part type | Source of plasmid |
|-----------------------------------------------------------------|----------------------------------------------------------|-----------------------------------------------------------------------------------------------------------------------------------------------------------------------|---------------|-------------------|
| pICH51277<br>MoClo Plant Parts Kit<br>Addgene (Kit #1000000047) | Level 0 - promoter   <b>p35s_0.4kb</b> - 5'UTR TMV omega | <a href="https://www.addgene.org/50268/">https://www.addgene.org/50268/</a>                                                                                           | PROM + 5UTR   | [7]               |
| pICH41388<br>MoClo Plant Parts Kit<br>Addgene (Kit #1000000047) | Level 0 - promoter   <b>p35s_0.4kb</b>                   | <a href="https://www.addgene.org/50253/">https://www.addgene.org/50253/</a>                                                                                           | PROM          | [7]               |
| pNK883                                                          | Level 0 - promoter   <b>pMinSyn104</b>                   | <a href="https://benchling.com/s/seq-bwu4KtFbPI7C3f7wrm5m?m=slm-LX8478zw5MY3eK6LxsCS">https://benchling.com/s/seq-bwu4KtFbPI7C3f7wrm5m?m=slm-LX8478zw5MY3eK6LxsCS</a> | PROM          | [5]               |
| pNK880                                                          | Level 0 - promoter   <b>pMinSyn105</b>                   | <a href="https://benchling.com/s/seq-mtPe4uNuJkUREyk1E9TB?m=slm-4P6pmRnEleWIYE24locP">https://benchling.com/s/seq-mtPe4uNuJkUREyk1E9TB?m=slm-4P6pmRnEleWIYE24locP</a> | PROM          |                   |
| pNK879                                                          | Level 0 - promoter   <b>pMinSyn108</b>                   | <a href="https://benchling.com/s/seq-qahowDDKd9M3JvNHfeDg?m=slm-CGsjRUx8x3bmlA2Y40xn">https://benchling.com/s/seq-qahowDDKd9M3JvNHfeDg?m=slm-CGsjRUx8x3bmlA2Y40xn</a> | PROM          |                   |
| pNK887                                                          | Level 0 - promoter   <b>pMinSyn110</b>                   | <a href="https://benchling.com/s/seq-Cn85nhOm0I2DMeEDzHBO?m=slm-cp1QzkzwES1QmA7dk7c6">https://benchling.com/s/seq-Cn85nhOm0I2DMeEDzHBO?m=slm-cp1QzkzwES1QmA7dk7c6</a> | PROM          |                   |
| pNK882                                                          | Level 0 - promoter   <b>pMinSyn159x</b>                  | <a href="https://benchling.com/s/seq-lAviApCq4kkds4HrfgNf?m=slm-ASMYEq0pM5bqFNVDpJql">https://benchling.com/s/seq-lAviApCq4kkds4HrfgNf?m=slm-ASMYEq0pM5bqFNVDpJql</a> | PROM          |                   |

|                                                                                           |                                             |                                                                                                                                                                       |             |      |
|-------------------------------------------------------------------------------------------|---------------------------------------------|-----------------------------------------------------------------------------------------------------------------------------------------------------------------------|-------------|------|
| pNK881                                                                                    | Level 0 - promoter   <b>pMinSyn1556x</b>    | <a href="https://benchling.com/s/seq-lvkyH4l3dhhdUx569J8A?m=slm-bztFB6F96JxkqnhuDyP6">https://benchling.com/s/seq-lvkyH4l3dhhdUx569J8A?m=slm-bztFB6F96JxkqnhuDyP6</a> | PROM        |      |
| pNK884                                                                                    | Level 0 - promoter   <b>pMinSyn1569x</b>    | <a href="https://benchling.com/s/seq-fmxiLzQJdsRj4vd3332T?m=slm-mSIQsnDH5xkF3BDAwtKA">https://benchling.com/s/seq-fmxiLzQJdsRj4vd3332T?m=slm-mSIQsnDH5xkF3BDAwtKA</a> | PROM        |      |
| pNK6030                                                                                   | Level 0 - promoter   <b>pMinSyn1637x</b>    | <a href="https://benchling.com/s/seq-UhSCuiyG3wbeYAofc97i?m=slm-M1s4yJgnDkcb08MPIMTj">https://benchling.com/s/seq-UhSCuiyG3wbeYAofc97i?m=slm-M1s4yJgnDkcb08MPIMTj</a> | PROM        |      |
| pNK885                                                                                    | Level 0 - promoter   <b>pMinSyn1824x</b>    | <a href="https://benchling.com/s/seq-JeaHhnuxRXrv2CifdrMi?m=slm-gNO7kcdpJJfknvoNcgvH">https://benchling.com/s/seq-JeaHhnuxRXrv2CifdrMi?m=slm-gNO7kcdpJJfknvoNcgvH</a> | PROM        |      |
| pNK878                                                                                    | Level 0 - promoter   <b>pMinSyn1904x</b>    | <a href="https://benchling.com/s/seq-lw4GyN7iasauX3DyXzuS?m=slm-WcW504iKeOw6zwznAFHg">https://benchling.com/s/seq-lw4GyN7iasauX3DyXzuS?m=slm-WcW504iKeOw6zwznAFHg</a> | PROM        |      |
| pNK875                                                                                    | Level 0 - promoter + 5U   <b>pAtTCTP</b>    | <a href="https://benchling.com/s/seq-clKcYEcm2UbC2DJcZuiz?m=slm-dV56BTwMS6j3n0TySGfb">https://benchling.com/s/seq-clKcYEcm2UbC2DJcZuiz?m=slm-dV56BTwMS6j3n0TySGfb</a> | PROM + 5UTR | [14] |
| pNK928                                                                                    | Level 0 - promoter + 5U   <b>pdel5_MtHP</b> | <a href="https://benchling.com/s/seq-fMZgG4tPifg3OGQTTPVX?m=slm-Y5CtJNoPrUwOWApIRSTM">https://benchling.com/s/seq-fMZgG4tPifg3OGQTTPVX?m=slm-Y5CtJNoPrUwOWApIRSTM</a> | PROM + 5UTR | [15] |
| pJOG684<br>MoClo Plant Parts II and<br>Infrastructure Kit<br>Addgene<br>(Kit #1000000135) | Level 0 - promoter + 5U   <b>pAtUBQ10</b>   | <a href="https://www.addgene.org/105355/">https://www.addgene.org/105355/</a>                                                                                         | PROM + 5UTR | [16] |

|                                                                                           |                                                            |                                                                                                                                                                       |                |      |
|-------------------------------------------------------------------------------------------|------------------------------------------------------------|-----------------------------------------------------------------------------------------------------------------------------------------------------------------------|----------------|------|
| pJOG603<br>MoClo Plant Parts II and<br>Infrastructure Kit<br>Addgene<br>(Kit #1000000135) | Level 0 - promoter + 5U   <b>pAtRPS5a</b>                  | <a href="https://www.addgene.org/105356/">https://www.addgene.org/105356/</a>                                                                                         | PROM +<br>5UTR | [16] |
| pNK869                                                                                    | Level 0 - promoter + 5U   <b>pAtPD7</b>                    | <a href="https://benchling.com/s/seq-CNlr9MZN9n6irNXQMYKb?m=slm-Rs0KA3oOcLiXcUold34X">https://benchling.com/s/seq-CNlr9MZN9n6irNXQMYKb?m=slm-Rs0KA3oOcLiXcUold34X</a> | PROM +<br>5UTR | [17] |
| pICH87644<br>MoClo Plants Part Kit<br>Addgene (Kit #1000000047)                           | Level 0 - promoter + 5U   <b>pAtAct2 + 5'UTR TMV omega</b> | <a href="https://www.addgene.org/50274/">https://www.addgene.org/50274/</a>                                                                                           | PROM +<br>5UTR | [7]  |
| pNK6032                                                                                   | Level 0 - promoter + 5U   <b>pFMV</b>                      | <a href="https://benchling.com/s/seq-iXRBZ2D4pW0tMjyhjBJT?m=slm-B4U18SGhRBGriHoJIABC">https://benchling.com/s/seq-iXRBZ2D4pW0tMjyhjBJT?m=slm-B4U18SGhRBGriHoJIABC</a> | PROM +<br>5UTR | [12] |
| pNK6031                                                                                   | Level 0 - promoter + 5U   <b>pCmYLCV</b>                   | <a href="https://benchling.com/s/seq-4oY2mNHqVNuj4XYIAkUY?m=slm-QUqDDSQAFmhUsuZLBvgI">https://benchling.com/s/seq-4oY2mNHqVNuj4XYIAkUY?m=slm-QUqDDSQAFmhUsuZLBvgI</a> | PROM +<br>5UTR | [13] |
| pICH44179<br>MoClo Plants Part Kit<br>Addgene (Kit #1000000047)                           | Level 0 - 5U   <b>AtRBCS2B</b>                             | <a href="https://www.addgene.org/50290/">https://www.addgene.org/50290/</a>                                                                                           | 5UTR           | [7]  |
| pICH41432<br>MoClo Plants Part Kit<br>Addgene (Kit #1000000047)                           | Level 0 - 3U + terminator   <b>tOCS</b>                    | <a href="https://www.addgene.org/50343/">https://www.addgene.org/50343/</a>                                                                                           | 3UTR+TE<br>RM  | [7]  |

|                                                                 |                                             |                                                                                                                                                                         |               |      |
|-----------------------------------------------------------------|---------------------------------------------|-------------------------------------------------------------------------------------------------------------------------------------------------------------------------|---------------|------|
| pICH44300<br>MoClo Plants Part Kit<br>Addgene (Kit #1000000047) | Level 0 - 3U + terminator   <b>tAtAct2</b>  | <a href="https://www.addgene.org/50340/">https://www.addgene.org/50340/</a>                                                                                             | 3UTR+TE<br>RM | [7]  |
| pICH71411<br>MoClo Plants Part Kit<br>Addgene (Kit #1000000047) | Level 0 - 3U + terminator   <b>tRBCS3C</b>  | <a href="https://www.addgene.org/50345/">https://www.addgene.org/50345/</a>                                                                                             | 3UTR+TE<br>RM | [7]  |
| pICH71431<br>MoClo Plants Part Kit<br>Addgene (Kit #1000000047) | Level 0 - 3U + terminator   <b>tATPase</b>  | <a href="https://www.addgene.org/50344/">https://www.addgene.org/50344/</a>                                                                                             | 3UTR+TE<br>RM | [7]  |
| pNK1198                                                         | Level 0 - 3U + terminator   <b>tHSP18.2</b> | <a href="https://benchling.com/s/seq-aw4gwtvqbls9HeZ40NTA?m=slm-bYfZI7MnwrijyEz63vfML">https://benchling.com/s/seq-aw4gwtvqbls9HeZ40NTA?m=slm-bYfZI7MnwrijyEz63vfML</a> | 3UTR+TE<br>RM | [18] |

**Table S3.** Primers used in this study.

| Primer name | Sequence                                                                                                                                                                                                       |
|-------------|----------------------------------------------------------------------------------------------------------------------------------------------------------------------------------------------------------------|
| pr748       | atgcGGTCTCaacatGGAGataggcaaccgtggacttcttcactagctcatcgagatagcaatgccactagctaatttcttac<br>gttgatcttatttgtttactttggggcatgacatggttaaaccatcaaagagaaagtgttcacttagtcaatatacgaattc<br>attcgaatttatccctgtaaactcctag      |
| pr749       | atgcGGTCTCaACAAtgaggtggcgaatgattccagggttttttttttttttttgcgtttattacaccagttcatcctaagaa<br>ctaggattacagggataaattcgaatgaattcgatatattgactagtggatgaaacactttctcttgatggggttaaccatgcatgc<br>cccaaagtaaaacaaataa          |
| pr750       | atgcGGTCTCaacatctcaataaactaaagctaccaattaccacaatatagtcttTcatatccacttagatataaaagataaaag<br>taaacaaatattaaatttcatatgcacgcataggaaactcatgatcttatcttttaaatagacatctagttttcttaggtataaatagac<br>atgttcctagaacttctcact   |
| pr751       | attaccacaatatagtcttTcatatccacttagatataaaagataaaagtaaacaaatattaaatttcatatgcacgcataggaaact<br>catgatcttatcttttaaatagacatctagttttcttaggtataaatagacattttgtcctagaacttctcactactaaaacctagcctc<br>aaATGTTGTtGAGACCgcat |
